# Supplementary material for: Habitat Availability and Heterogeneity and the Indo-Pacific Warm Pool as Predictors of Marine Species Richness in the Tropical Indo-Pacific
Source: PubMed Central journal article supplement (PMC3574161; doi:10.1371/journal.pone.0056245), 2013-02-15

**Figure S7 Combined adjacent cells (red color) against the regular sized cells (yellow color).**

(A) Small grid, (B) Medium grid, (C) Large grid, (D) UTM, (E) UTM shifted north/south, (F) UTM shifted east/west, (G) UTM shifted northeast/southwest. There are no adjacent cells that were combined in extra large and largest grids.

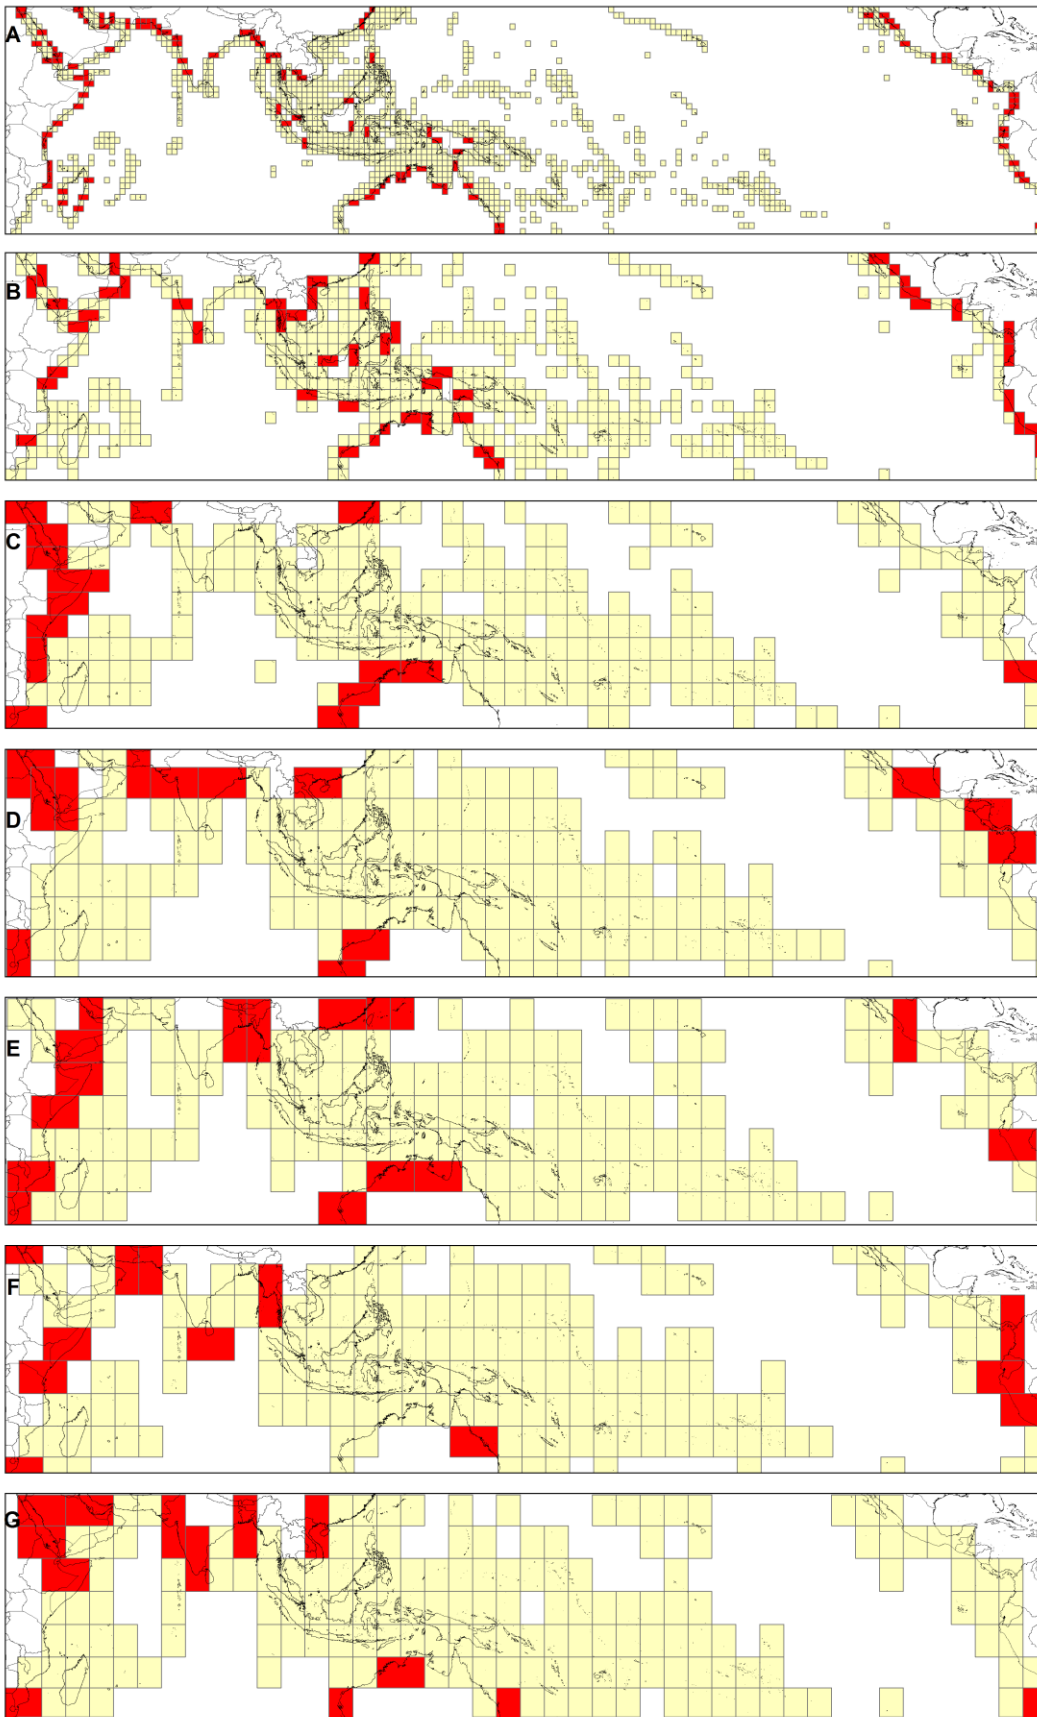

Supplement: pone.0056245.s007.pdf [file pone.0056245.s007.pdf]
