# Supplementary material for: Habitat Availability and Heterogeneity and the Indo-Pacific Warm Pool as Predictors of Marine Species Richness in the Tropical Indo-Pacific
Source: PubMed Central journal article supplement (PMC3574161; doi:10.1371/journal.pone.0056245), 2013-02-15

**Figure S8 The two types of basemaps used in this study.**

(A) Visualization basemap consisting of 200 m depth and 100 km buffer, (B) Bathymetry basemap showing the 200 m depth used in analyses of species richness versus independent variables.

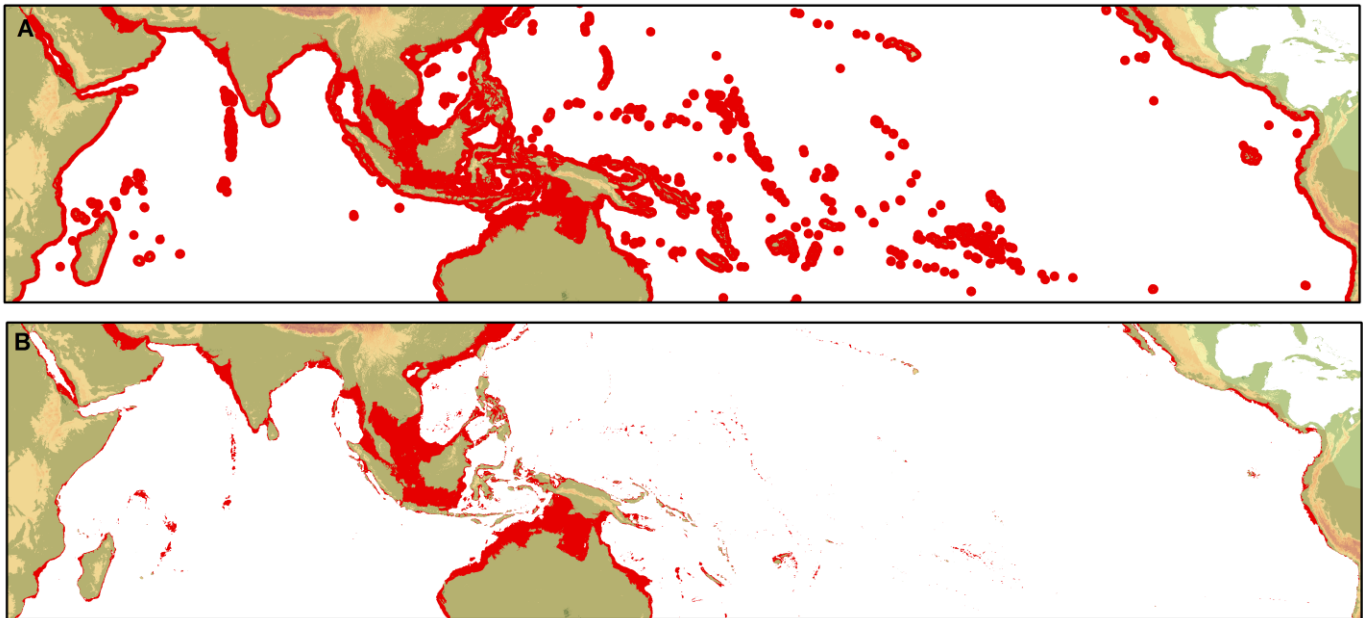

Supplement: pone.0056245.s008.pdf [file pone.0056245.s008.pdf]
