# Supplementary material for: Habitat Availability and Heterogeneity and the Indo-Pacific Warm Pool as Predictors of Marine Species Richness in the Tropical Indo-Pacific
Source: PubMed Central journal article supplement (PMC3574161; doi:10.1371/journal.pone.0056245), 2013-02-15
Supplement: pone.0056245.s015.pdf [file pone.0056245.s015.pdf]

**Table S2 Multiple predictor Generalized Linear Model (GLM) and Spatial Linear Model (SLM) results at different UTM grid orientations.**

| Models                                                             | Grid Size | n   | SW       | CL        | HDla     | HDln     | SST      | NPP     | Moran's I | R <sup>2</sup> /<br>p-R <sup>2</sup> | AIC    |
|--------------------------------------------------------------------|-----------|-----|----------|-----------|----------|----------|----------|---------|-----------|--------------------------------------|--------|
| <b>Single predictor GLM (t-values) for all species</b>             | UTM NS    | 168 | 2.959**  | 3.787***  | 2.478*   | 3.356*** | 6.112*** |         | 0.2590*** | 0.604                                | 288.39 |
|                                                                    | UTM EW    | 173 | 3.317**  | 2.585*    |          | 3.721*** | 7.331*** |         | 0.3359*** | 0.557                                | 316.58 |
|                                                                    | UTM NE    | 168 | 4.910*** | 2.224*    | 4.240*** | 3.384*** | 5.585*** |         | 0.1744*** | 0.664                                | 260.13 |
| <b>Single predictor SLM (z-values) for all species</b>             | UTM NS    | 168 |          | 9.657***  |          | 2.988**  | 3.934*** |         | -0.0223   | 0.683                                | 254.17 |
|                                                                    | UTM EW    | 173 |          | 9.939***  |          |          | 5.705*** |         | -0.0091   | 0.669                                | 268.57 |
|                                                                    | UTM NE    | 168 | 2.668**  | 4.204***  | 4.045*** | 4.677*** | 2.852**  |         | -0.0137   | 0.715                                | 239.56 |
| <b>Single predictor GLM (t-values) for all fishes</b>              | UTM NS    | 168 | 2.774**  | 5.204***  |          | 4.364*** | 6.724*** |         | 0.2630*** | 0.637                                | 240.48 |
|                                                                    | UTM EW    | 173 | 3.339**  | 3.548***  |          | 3.312**  | 6.873*** |         | 0.3067*** | 0.586                                | 276.54 |
|                                                                    | UTM NE    | 168 | 4.938*** | 2.696**   | 3.993*** | 3.544*** | 5.660*** | 2.400*  | 0.1758*** | 0.694                                | 210.96 |
| <b>Single predictor SLM (z-values) for all fishes</b>              | UTM NS    | 168 |          | 10.605*** |          | 2.970**  | 3.706*** |         | -0.0222   | 0.707                                | 208.33 |
|                                                                    | UTM EW    | 173 |          | 10.542*** |          |          | 5.821*** |         | -0.0068   | 0.675                                | 236.51 |
|                                                                    | UTM NE    | 168 | 3.373*** | 3.683***  | 3.004**  | 2.143*   | 5.010*** | 3.068** | -0.0094   | 0.737                                | 193.95 |
| <b>Single predictor GLM (t-values) for invertebrates</b>           | UTM NS    | 168 |          | 5.123***  | 3.136**  | 3.660*** | 4.240*** |         | 0.3467*** | 0.426                                | 494.49 |
|                                                                    | UTM EW    | 173 | 4.804*** |           | 2.888**  | 2.499*   | 4.185*** |         | 0.3277*** | 0.362                                | 529.48 |
|                                                                    | UTM NE    | 168 | 6.672*** |           | 6.361*** | 3.422*** | 3.073**  |         | 0.2099*** | 0.531                                | 468.31 |
| <b>Single predictor SLM (z-values) for invertebrates</b>           | UTM NS    | 168 | -3.055** | 7.287***  |          | 2.758**  | 2.436*   |         | -0.0215   | 0.591                                | 443.64 |
|                                                                    | UTM EW    | 173 |          | 7.842***  |          |          | 3.523*** |         | -0.0222   | 0.553                                | 470.23 |
|                                                                    | UTM NE    | 168 |          | 8.532***  | 4.500*** |          | 2.388*   | 2.163*  | -0.0305   | 0.64                                 | 430.22 |
| <b>Single predictor GLM (t-values) for habitat-forming species</b> | UTM NS    | 168 | 2.034*   | 2.182*    | 2.256*   | 3.993*** | 6.277*** |         | 0.2632*** | 0.513                                | 533.22 |
|                                                                    | UTM EW    | 173 | 6.576*** |           | 2.109*   | 3.205**  | 6.292*** |         | 0.3240*** | 0.492                                | 543.43 |
|                                                                    | UTM NE    | 168 | 7.580*** |           | 4.869*** | 4.103*** | 5.446*** |         | 0.2297*** | 0.596                                | 507.25 |
| <b>Single predictor SLM (z-values) for habitat-forming species</b> | UTM NS    | 168 |          | 7.952***  | 2.668**  |          | 3.649*** |         | 0.0022    | 0.626                                | 491.89 |
|                                                                    | UTM EW    | 173 | 6.773*** |           | 0.921**  |          | 4.061*** |         | 0.0017    | 0.625                                | 495.24 |
|                                                                    | UTM NE    | 168 |          | 8.589***  | 3.640*** |          | 2.811**  |         | -0.0126   | 0.682                                | 470.92 |

The predictors are shallow water area (SW), coastline length (CL), habitat diversity based on area (HDla), habitat diversity based on number of patches (HDln), sea surface temperature (SST), and net primary productivity (NPP). Values under predictor variables are t-values for GLM and z-values for SLM. Asterisks indicate significance value of P: \* (<0.05), \*\* (<0.01); \*\*\* (<0.001). UTM NS = centroid shifted on a North-South plane, UTM EW = centroid shifted on an East-West plane and UTM NE = centroid shifted along a Northeast-Southwest plane. Sample size for each grid (n) is shown. R<sup>2</sup> values are for GLM results, while pseudo-R<sup>2</sup> (p-R<sup>2</sup>) values are for SLM results.
