# Supplementary material for: Habitat Availability and Heterogeneity and the Indo-Pacific Warm Pool as Predictors of Marine Species Richness in the Tropical Indo-Pacific
Source: PubMed Central journal article supplement (PMC3574161; doi:10.1371/journal.pone.0056245), 2013-02-15
Supplement: pone.0056245.s016.pdf [file pone.0056245.s016.pdf]

**Table S3 List of families with the number of species distribution maps used in this study.**

| <i>Kingdom</i>  | <i>Group</i> | <i>Family</i>    | <i>Number of Species</i> |
|-----------------|--------------|------------------|--------------------------|
| <b>Plantae</b>  | Mangroves    | Acanthaceae      | 11                       |
| <b>Plantae</b>  | Mangroves    | Arecaceae        | 2                        |
| <b>Plantae</b>  | Mangroves    | Bignoniaceae     | 2                        |
| <b>Plantae</b>  | Mangroves    | Combretaceae     | 4                        |
| <b>Plantae</b>  | Mangroves    | Ebenaceae        | 1                        |
| <b>Plantae</b>  | Mangroves    | Euphorbiaceae    | 2                        |
| <b>Plantae</b>  | Mangroves    | Fabaceae         | 2                        |
| <b>Plantae</b>  | Mangroves    | Lythraceae       | 7                        |
| <b>Plantae</b>  | Mangroves    | Malvaceae        | 7                        |
| <b>Plantae</b>  | Mangroves    | Meliaceae        | 3                        |
| <b>Plantae</b>  | Mangroves    | Myrsinaceae      | 2                        |
| <b>Plantae</b>  | Mangroves    | Myrtaceae        | 1                        |
| <b>Plantae</b>  | Mangroves    | Plumbaginaceae   | 2                        |
| <b>Plantae</b>  | Mangroves    | Pteridaceae      | 3                        |
| <b>Plantae</b>  | Mangroves    | Rhizophoraceae   | 18                       |
| <b>Plantae</b>  | Mangroves    | Rubiaceae        | 1                        |
| <b>Plantae</b>  | Mangroves    | Tetrameristaceae | 1                        |
| <b>Plantae</b>  | Seagrasses   | Cymodoceaceae    | 13                       |
| <b>Plantae</b>  | Seagrasses   | Hydrocharitaceae | 19                       |
| <b>Plantae</b>  | Seagrasses   | Posidoniaceae    | 4                        |
| <b>Plantae</b>  | Seagrasses   | Ruppiaceae       | 3                        |
| <b>Plantae</b>  | Seagrasses   | Zannichelliaceae | 1                        |
| <b>Plantae</b>  | Seagrasses   | Zosteraceae      | 10                       |
| <b>Animalia</b> | Corals       | Acroporidae      | 269                      |
| <b>Animalia</b> | Corals       | Agariciidae      | 45                       |
| <b>Animalia</b> | Corals       | Astrocoeniidae   | 13                       |
| <b>Animalia</b> | Corals       | Caryophylliidae  | 3                        |
| <b>Animalia</b> | Corals       | Dendrophylliidae | 14                       |
| <b>Animalia</b> | Corals       | Euphyllidae      | 16                       |
| <b>Animalia</b> | Corals       | Faviidae         | 128                      |
| <b>Animalia</b> | Corals       | Fungiidae        | 46                       |
| <b>Animalia</b> | Corals       | Helioporidae     | 1                        |
| <b>Animalia</b> | Corals       | Meandrinidae     | 9                        |
| <b>Animalia</b> | Corals       | Merulinidae      | 12                       |
| <b>Animalia</b> | Corals       | Milleporidae     | 13                       |
| <b>Animalia</b> | Corals       | Mussidae         | 49                       |
| <b>Animalia</b> | Corals       | Oculinidae       | 11                       |
| <b>Animalia</b> | Corals       | Pectinidae       | 29                       |
| <b>Animalia</b> | Corals       | Pocilloporidae   | 31                       |
| <b>Animalia</b> | Corals       | Poritidae        | 99                       |
| <b>Animalia</b> | Corals       | Siderastreidae   | 30                       |
| <b>Animalia</b> | Corals       | Trachyphylliidae | 1                        |
| <b>Animalia</b> | Corals       | Tubiporidae      | 1                        |
| <b>Animalia</b> | Molluscs     | Actinocyclusidae | 2                        |
| <b>Animalia</b> | Molluscs     | Bursidae         | 20                       |
| <b>Animalia</b> | Molluscs     | Callochitonidae  | 15                       |
| <b>Animalia</b> | Molluscs     | Cassidae         | 21                       |

|                 |             |                  |     |
|-----------------|-------------|------------------|-----|
| <b>Animalia</b> | Molluscs    | Cerithiidae      | 8   |
| <b>Animalia</b> | Molluscs    | Chaetopleuridae  | 1   |
| <b>Animalia</b> | Molluscs    | Condylocardiidae | 12  |
| <b>Animalia</b> | Molluscs    | Cypraeidae       | 187 |
| <b>Animalia</b> | Molluscs    | Haliotidae       | 46  |
| <b>Animalia</b> | Molluscs    | Harpidae         | 14  |
| <b>Animalia</b> | Molluscs    | Hemiarthridae    | 3   |
| <b>Animalia</b> | Molluscs    | Ischnochitonidae | 39  |
| <b>Animalia</b> | Molluscs    | Leptochitonidae  | 19  |
| <b>Animalia</b> | Molluscs    | Littorinidae     | 46  |
| <b>Animalia</b> | Molluscs    | Mitridae         | 180 |
| <b>Animalia</b> | Molluscs    | Muricidae        | 9   |
| <b>Animalia</b> | Molluscs    | Olividae         | 114 |
| <b>Animalia</b> | Molluscs    | Patellidae       | 40  |
| <b>Animalia</b> | Molluscs    | Personidae       | 15  |
| <b>Animalia</b> | Molluscs    | Phasianellidae   | 2   |
| <b>Animalia</b> | Molluscs    | Pinnidae         | 7   |
| <b>Animalia</b> | Molluscs    | Ranellidae       | 48  |
| <b>Animalia</b> | Molluscs    | Strombidae       | 50  |
| <b>Animalia</b> | Molluscs    | Tonicellidae     | 14  |
| <b>Animalia</b> | Molluscs    | Tridacnidae      | 6   |
| <b>Animalia</b> | Molluscs    | Triviidae        | 18  |
| <b>Animalia</b> | Molluscs    | Trochidae        | 6   |
| <b>Animalia</b> | Molluscs    | Vasidae          | 13  |
| <b>Animalia</b> | Crustaceans | Diogenidae       | 19  |
| <b>Animalia</b> | Crustaceans | Dynomenidae      | 10  |
| <b>Animalia</b> | Crustaceans | Eurysquillidae   | 5   |
| <b>Animalia</b> | Crustaceans | Gonodactylidae   | 20  |
| <b>Animalia</b> | Crustaceans | Harpiosquillidae | 5   |
| <b>Animalia</b> | Crustaceans | Heterosquillidae | 1   |
| <b>Animalia</b> | Crustaceans | Homolidae        | 44  |
| <b>Animalia</b> | Crustaceans | Homolodromiidae  | 10  |
| <b>Animalia</b> | Crustaceans | Leucosiidae      | 26  |
| <b>Animalia</b> | Crustaceans | Lysiosquillidae  | 3   |
| <b>Animalia</b> | Crustaceans | Nannosquillidae  | 3   |
| <b>Animalia</b> | Crustaceans | Odontodactylidae | 2   |
| <b>Animalia</b> | Crustaceans | Portunidae       | 35  |
| <b>Animalia</b> | Crustaceans | Protosquillidae  | 6   |
| <b>Animalia</b> | Crustaceans | Pseudosquillidae | 2   |
| <b>Animalia</b> | Crustaceans | Rhynchocinetidae | 6   |
| <b>Animalia</b> | Crustaceans | Squillidae       | 31  |
| <b>Animalia</b> | Crustaceans | Takuidae         | 1   |
| <b>Animalia</b> | Crustaceans | Trapeziidae      | 28  |
| <b>Animalia</b> | Chimaeras   | Callorhynchidae  | 2   |
| <b>Animalia</b> | Chimaeras   | Chimaeridae      | 15  |
| <b>Animalia</b> | Chimaeras   | Rhinochimaeridae | 5   |
| <b>Animalia</b> | Sharks      | Alopiidae        | 3   |
| <b>Animalia</b> | Sharks      | Brachaeluridae   | 2   |
| <b>Animalia</b> | Sharks      | Carcharhinidae   | 51  |

|                 |               |                    |     |
|-----------------|---------------|--------------------|-----|
| <b>Animalia</b> | Sharks        | Centrophoridae     | 15  |
| <b>Animalia</b> | Sharks        | Cetorhinidae       | 1   |
| <b>Animalia</b> | Sharks        | Chlamydoselachidae | 1   |
| <b>Animalia</b> | Sharks        | Dalatiidae         | 9   |
| <b>Animalia</b> | Sharks        | Echinorhinidae     | 2   |
| <b>Animalia</b> | Sharks        | Etmopteridae       | 35  |
| <b>Animalia</b> | Sharks        | Ginglymostomatidae | 3   |
| <b>Animalia</b> | Sharks        | Hemigaleidae       | 7   |
| <b>Animalia</b> | Sharks        | Hemiscylliidae     | 12  |
| <b>Animalia</b> | Sharks        | Heterodontidae     | 9   |
| <b>Animalia</b> | Sharks        | Hexanchidae        | 4   |
| <b>Animalia</b> | Sharks        | Lamnidae           | 5   |
| <b>Animalia</b> | Sharks        | Megachasmidae      | 1   |
| <b>Animalia</b> | Sharks        | Mitsukurinidae     | 1   |
| <b>Animalia</b> | Sharks        | Odontaspidae       | 3   |
| <b>Animalia</b> | Sharks        | Orectolobidae      | 10  |
| <b>Animalia</b> | Sharks        | Oxynotidae         | 1   |
| <b>Animalia</b> | Sharks        | Parascylliidae     | 5   |
| <b>Animalia</b> | Sharks        | Proscylliidae      | 5   |
| <b>Animalia</b> | Sharks        | Pseudocarchariidae | 1   |
| <b>Animalia</b> | Sharks        | Pseudotriakidae    | 16  |
| <b>Animalia</b> | Sharks        | Rhincodontidae     | 1   |
| <b>Animalia</b> | Sharks        | Scyliorhinidae     | 107 |
| <b>Animalia</b> | Sharks        | Somniosidae        | 9   |
| <b>Animalia</b> | Sharks        | Sphyrnidae         | 8   |
| <b>Animalia</b> | Sharks        | Squalidae          | 23  |
| <b>Animalia</b> | Sharks        | Squatinae          | 13  |
| <b>Animalia</b> | Sharks        | Stegostomatidae    | 2   |
| <b>Animalia</b> | Sharks        | Triakidae          | 37  |
| <b>Animalia</b> | Batoid Fishes | Anacanthobatidae   | 23  |
| <b>Animalia</b> | Batoid Fishes | Arhynchobatidae    | 14  |
| <b>Animalia</b> | Batoid Fishes | Dasyatidae         | 55  |
| <b>Animalia</b> | Batoid Fishes | Gymnuridae         | 9   |
| <b>Animalia</b> | Batoid Fishes | Hexatrygonidae     | 1   |
| <b>Animalia</b> | Batoid Fishes | Hypnidae           | 1   |
| <b>Animalia</b> | Batoid Fishes | Mobulidae          | 8   |
| <b>Animalia</b> | Batoid Fishes | Myliobatidae       | 17  |
| <b>Animalia</b> | Batoid Fishes | Narcinidae         | 24  |
| <b>Animalia</b> | Batoid Fishes | Narkidae           | 9   |
| <b>Animalia</b> | Batoid Fishes | Platyrrhinidae     | 3   |
| <b>Animalia</b> | Batoid Fishes | Plesiobatidae      | 1   |
| <b>Animalia</b> | Batoid Fishes | Pristidae          | 6   |
| <b>Animalia</b> | Batoid Fishes | Pristiophoridae    | 6   |
| <b>Animalia</b> | Batoid Fishes | Rajidae            | 62  |
| <b>Animalia</b> | Batoid Fishes | Rhinidae           | 1   |
| <b>Animalia</b> | Batoid Fishes | Rhinobatidae       | 37  |
| <b>Animalia</b> | Batoid Fishes | Rhinopteridae      | 5   |
| <b>Animalia</b> | Batoid Fishes | Rhynchobatidae     | 3   |
| <b>Animalia</b> | Batoid Fishes | Torpedinidae       | 13  |

|                 |               |                    |     |
|-----------------|---------------|--------------------|-----|
| <b>Animalia</b> | Batoid Fishes | Urolophidae        | 20  |
| <b>Animalia</b> | Batoid Fishes | Urotrygonidae      | 13  |
| <b>Animalia</b> | Bony Fishes   | Acanthuridae       | 75  |
| <b>Animalia</b> | Bony Fishes   | Achiridae          | 8   |
| <b>Animalia</b> | Bony Fishes   | Acropomatidae      | 16  |
| <b>Animalia</b> | Bony Fishes   | Albulidae          | 11  |
| <b>Animalia</b> | Bony Fishes   | Amarsipidae        | 1   |
| <b>Animalia</b> | Bony Fishes   | Ambassidae         | 16  |
| <b>Animalia</b> | Bony Fishes   | Ammodytidae        | 9   |
| <b>Animalia</b> | Bony Fishes   | Anablepidae        | 2   |
| <b>Animalia</b> | Bony Fishes   | Anguillidae        | 10  |
| <b>Animalia</b> | Bony Fishes   | Anomalopidae       | 4   |
| <b>Animalia</b> | Bony Fishes   | Antennariidae      | 33  |
| <b>Animalia</b> | Bony Fishes   | Apistidae          | 1   |
| <b>Animalia</b> | Bony Fishes   | Aploactinidae      | 37  |
| <b>Animalia</b> | Bony Fishes   | Apogonidae         | 249 |
| <b>Animalia</b> | Bony Fishes   | Argentinidae       | 2   |
| <b>Animalia</b> | Bony Fishes   | Ariidae            | 73  |
| <b>Animalia</b> | Bony Fishes   | Ariommatidae       | 2   |
| <b>Animalia</b> | Bony Fishes   | Arripidae          | 4   |
| <b>Animalia</b> | Bony Fishes   | Atherinidae        | 32  |
| <b>Animalia</b> | Bony Fishes   | Atherinopsidae     | 17  |
| <b>Animalia</b> | Bony Fishes   | Aulopidae          | 1   |
| <b>Animalia</b> | Bony Fishes   | Aulostomidae       | 1   |
| <b>Animalia</b> | Bony Fishes   | Balistidae         | 31  |
| <b>Animalia</b> | Bony Fishes   | Batrachoididae     | 30  |
| <b>Animalia</b> | Bony Fishes   | Belonidae          | 25  |
| <b>Animalia</b> | Bony Fishes   | Bembridae          | 3   |
| <b>Animalia</b> | Bony Fishes   | Berycidae          | 7   |
| <b>Animalia</b> | Bony Fishes   | Blenniidae         | 299 |
| <b>Animalia</b> | Bony Fishes   | Bothidae           | 113 |
| <b>Animalia</b> | Bony Fishes   | Brachionochthyidae | 1   |
| <b>Animalia</b> | Bony Fishes   | Bramidae           | 11  |
| <b>Animalia</b> | Bony Fishes   | Branchiostegidae   | 12  |
| <b>Animalia</b> | Bony Fishes   | Bregmacerotidae    | 9   |
| <b>Animalia</b> | Bony Fishes   | Bythitidae         | 89  |
| <b>Animalia</b> | Bony Fishes   | Caesionidae        | 20  |
| <b>Animalia</b> | Bony Fishes   | Callanathiidae     | 7   |
| <b>Animalia</b> | Bony Fishes   | Callionymidae      | 139 |
| <b>Animalia</b> | Bony Fishes   | Caproidae          | 5   |
| <b>Animalia</b> | Bony Fishes   | Caracanthidae      | 4   |
| <b>Animalia</b> | Bony Fishes   | Carangidae         | 102 |
| <b>Animalia</b> | Bony Fishes   | Carapidae          | 22  |
| <b>Animalia</b> | Bony Fishes   | Centracanthidae    | 2   |
| <b>Animalia</b> | Bony Fishes   | Centriscidae       | 8   |
| <b>Animalia</b> | Bony Fishes   | Centrogeniidae     | 2   |
| <b>Animalia</b> | Bony Fishes   | Centrolophidae     | 6   |
| <b>Animalia</b> | Bony Fishes   | Centropomidae      | 7   |
| <b>Animalia</b> | Bony Fishes   | Cepolidae          | 4   |

|                 |             |                  |     |
|-----------------|-------------|------------------|-----|
| <b>Animalia</b> | Bony Fishes | Chaenopsidae     | 32  |
| <b>Animalia</b> | Bony Fishes | Chaetodontidae   | 112 |
| <b>Animalia</b> | Bony Fishes | Chanidae         | 1   |
| <b>Animalia</b> | Bony Fishes | Cheilodactylidae | 17  |
| <b>Animalia</b> | Bony Fishes | Chirocentridae   | 2   |
| <b>Animalia</b> | Bony Fishes | Chlopsidae       | 10  |
| <b>Animalia</b> | Bony Fishes | Cichlidae        | 1   |
| <b>Animalia</b> | Bony Fishes | Cirrhitidae      | 29  |
| <b>Animalia</b> | Bony Fishes | Citharidae       | 4   |
| <b>Animalia</b> | Bony Fishes | Clinidae         | 3   |
| <b>Animalia</b> | Bony Fishes | Clupeidae        | 86  |
| <b>Animalia</b> | Bony Fishes | Congridae        | 48  |
| <b>Animalia</b> | Bony Fishes | Coryphaenidae    | 2   |
| <b>Animalia</b> | Bony Fishes | Creediidae       | 10  |
| <b>Animalia</b> | Bony Fishes | Cynoglossidae    | 78  |
| <b>Animalia</b> | Bony Fishes | Cyttidae         | 1   |
| <b>Animalia</b> | Bony Fishes | Dactylopteridae  | 6   |
| <b>Animalia</b> | Bony Fishes | Dactyloscopidae  | 23  |
| <b>Animalia</b> | Bony Fishes | Dentatherinidae  | 1   |
| <b>Animalia</b> | Bony Fishes | Dinopercidae     | 1   |
| <b>Animalia</b> | Bony Fishes | Diodontidae      | 11  |
| <b>Animalia</b> | Bony Fishes | Drepanidae       | 2   |
| <b>Animalia</b> | Bony Fishes | Echeneidae       | 7   |
| <b>Animalia</b> | Bony Fishes | Eleotridae       | 41  |
| <b>Animalia</b> | Bony Fishes | Elopidae         | 2   |
| <b>Animalia</b> | Bony Fishes | Embiotocidae     | 1   |
| <b>Animalia</b> | Bony Fishes | Engraulidae      | 92  |
| <b>Animalia</b> | Bony Fishes | Enoplosidae      | 1   |
| <b>Animalia</b> | Bony Fishes | Ephippidae       | 12  |
| <b>Animalia</b> | Bony Fishes | Epigonidae       | 1   |
| <b>Animalia</b> | Bony Fishes | Exocoetidae      | 51  |
| <b>Animalia</b> | Bony Fishes | Fistulariidae    | 3   |
| <b>Animalia</b> | Bony Fishes | Gempylidae       | 4   |
| <b>Animalia</b> | Bony Fishes | Gerreidae        | 34  |
| <b>Animalia</b> | Bony Fishes | Girellidae       | 2   |
| <b>Animalia</b> | Bony Fishes | Glaucosomatidae  | 4   |
| <b>Animalia</b> | Bony Fishes | Gobiesocidae     | 62  |
| <b>Animalia</b> | Bony Fishes | Gobiidae         | 848 |
| <b>Animalia</b> | Bony Fishes | Gonorynchidae    | 5   |
| <b>Animalia</b> | Bony Fishes | Haemulidae       | 97  |
| <b>Animalia</b> | Bony Fishes | Hemiramphidae    | 49  |
| <b>Animalia</b> | Bony Fishes | Heterenchelyidae | 1   |
| <b>Animalia</b> | Bony Fishes | Holocentridae    | 67  |
| <b>Animalia</b> | Bony Fishes | Hoplichthyidae   | 7   |
| <b>Animalia</b> | Bony Fishes | Isonidae         | 3   |
| <b>Animalia</b> | Bony Fishes | Istiophoridae    | 5   |
| <b>Animalia</b> | Bony Fishes | Kraemeriidae     | 8   |
| <b>Animalia</b> | Bony Fishes | Kuhliidae        | 10  |
| <b>Animalia</b> | Bony Fishes | Kurtidae         | 2   |

|                 |             |                   |     |
|-----------------|-------------|-------------------|-----|
| <b>Animalia</b> | Bony Fishes | Kyphosidae        | 38  |
| <b>Animalia</b> | Bony Fishes | Labridae          | 471 |
| <b>Animalia</b> | Bony Fishes | Labrisomidae      | 42  |
| <b>Animalia</b> | Bony Fishes | Lactariidae       | 1   |
| <b>Animalia</b> | Bony Fishes | Lampridae         | 2   |
| <b>Animalia</b> | Bony Fishes | Latidae           | 1   |
| <b>Animalia</b> | Bony Fishes | Latimeriidae      | 1   |
| <b>Animalia</b> | Bony Fishes | Leiognathidae     | 43  |
| <b>Animalia</b> | Bony Fishes | Lepisosteidae     | 1   |
| <b>Animalia</b> | Bony Fishes | Leptobramidae     | 1   |
| <b>Animalia</b> | Bony Fishes | Leptoscopidae     | 1   |
| <b>Animalia</b> | Bony Fishes | Lethrinidae       | 37  |
| <b>Animalia</b> | Bony Fishes | Lobotidae         | 4   |
| <b>Animalia</b> | Bony Fishes | Lophichthyidae    | 1   |
| <b>Animalia</b> | Bony Fishes | Lophiidae         | 6   |
| <b>Animalia</b> | Bony Fishes | Lutjanidae        | 82  |
| <b>Animalia</b> | Bony Fishes | Luvaridae         | 1   |
| <b>Animalia</b> | Bony Fishes | Macrorhamphosidae | 1   |
| <b>Animalia</b> | Bony Fishes | Malacanthidae     | 16  |
| <b>Animalia</b> | Bony Fishes | Megalopidae       | 2   |
| <b>Animalia</b> | Bony Fishes | Menidae           | 1   |
| <b>Animalia</b> | Bony Fishes | Merlucciidae      | 3   |
| <b>Animalia</b> | Bony Fishes | Microcanthidae    | 1   |
| <b>Animalia</b> | Bony Fishes | Microdesmidae     | 23  |
| <b>Animalia</b> | Bony Fishes | Molidae           | 4   |
| <b>Animalia</b> | Bony Fishes | Monacanthidae     | 64  |
| <b>Animalia</b> | Bony Fishes | Monocentridae     | 2   |
| <b>Animalia</b> | Bony Fishes | Monodactylidae    | 5   |
| <b>Animalia</b> | Bony Fishes | Moridae           | 17  |
| <b>Animalia</b> | Bony Fishes | Moringuidae       | 7   |
| <b>Animalia</b> | Bony Fishes | Mugilidae         | 53  |
| <b>Animalia</b> | Bony Fishes | Mullidae          | 55  |
| <b>Animalia</b> | Bony Fishes | Muraenesocidae    | 6   |
| <b>Animalia</b> | Bony Fishes | Muraenidae        | 140 |
| <b>Animalia</b> | Bony Fishes | Myrocongridae     | 1   |
| <b>Animalia</b> | Bony Fishes | Nematistiidae     | 1   |
| <b>Animalia</b> | Bony Fishes | Nemipteridae      | 65  |
| <b>Animalia</b> | Bony Fishes | Neosebastidae     | 6   |
| <b>Animalia</b> | Bony Fishes | Nettastomatidae   | 3   |
| <b>Animalia</b> | Bony Fishes | Nomeidae          | 12  |
| <b>Animalia</b> | Bony Fishes | Ogcocephalidae    | 10  |
| <b>Animalia</b> | Bony Fishes | Ophichthidae      | 137 |
| <b>Animalia</b> | Bony Fishes | Ophidiidae        | 25  |
| <b>Animalia</b> | Bony Fishes | Opisthognathidae  | 67  |
| <b>Animalia</b> | Bony Fishes | Oplegnathidae     | 1   |
| <b>Animalia</b> | Bony Fishes | Ostraciidae       | 14  |
| <b>Animalia</b> | Bony Fishes | Parabembridae     | 1   |
| <b>Animalia</b> | Bony Fishes | Paralichthyidae   | 59  |
| <b>Animalia</b> | Bony Fishes | Pegasidae         | 5   |

|                 |             |                    |     |
|-----------------|-------------|--------------------|-----|
| <b>Animalia</b> | Bony Fishes | Pempheridae        | 21  |
| <b>Animalia</b> | Bony Fishes | Pentacerotidae     | 7   |
| <b>Animalia</b> | Bony Fishes | Percophidae        | 9   |
| <b>Animalia</b> | Bony Fishes | Peristediidae      | 5   |
| <b>Animalia</b> | Bony Fishes | Phallostethidae    | 3   |
| <b>Animalia</b> | Bony Fishes | Pholidichthyidae   | 2   |
| <b>Animalia</b> | Bony Fishes | Pinguipedidae      | 47  |
| <b>Animalia</b> | Bony Fishes | Platycephalidae    | 68  |
| <b>Animalia</b> | Bony Fishes | Plesiopidae        | 40  |
| <b>Animalia</b> | Bony Fishes | Pleuronectidae     | 27  |
| <b>Animalia</b> | Bony Fishes | Plotosidae         | 13  |
| <b>Animalia</b> | Bony Fishes | Poeciliidae        | 5   |
| <b>Animalia</b> | Bony Fishes | Polynemidae        | 29  |
| <b>Animalia</b> | Bony Fishes | Polyprionidae      | 1   |
| <b>Animalia</b> | Bony Fishes | Pomacanthidae      | 80  |
| <b>Animalia</b> | Bony Fishes | Pomacentridae      | 327 |
| <b>Animalia</b> | Bony Fishes | Pomatomidae        | 1   |
| <b>Animalia</b> | Bony Fishes | Priacanthidae      | 16  |
| <b>Animalia</b> | Bony Fishes | Pristigasteridae   | 15  |
| <b>Animalia</b> | Bony Fishes | Psettodidae        | 1   |
| <b>Animalia</b> | Bony Fishes | Pseudochromidae    | 141 |
| <b>Animalia</b> | Bony Fishes | Pseudomugilidae    | 3   |
| <b>Animalia</b> | Bony Fishes | Ptereleotridae     | 40  |
| <b>Animalia</b> | Bony Fishes | Rachycentridae     | 1   |
| <b>Animalia</b> | Bony Fishes | Samaridae          | 1   |
| <b>Animalia</b> | Bony Fishes | Scatophagidae      | 4   |
| <b>Animalia</b> | Bony Fishes | Schindleriidae     | 3   |
| <b>Animalia</b> | Bony Fishes | Sciaenidae         | 184 |
| <b>Animalia</b> | Bony Fishes | Scombridae         | 38  |
| <b>Animalia</b> | Bony Fishes | Scombrolabracidae  | 1   |
| <b>Animalia</b> | Bony Fishes | Scorpaenidae       | 167 |
| <b>Animalia</b> | Bony Fishes | Scorpididae        | 1   |
| <b>Animalia</b> | Bony Fishes | Sebastidae         | 1   |
| <b>Animalia</b> | Bony Fishes | Serranidae         | 352 |
| <b>Animalia</b> | Bony Fishes | Setarchidae        | 2   |
| <b>Animalia</b> | Bony Fishes | Siganidae          | 28  |
| <b>Animalia</b> | Bony Fishes | Sillaginidae       | 29  |
| <b>Animalia</b> | Bony Fishes | Soleidae           | 99  |
| <b>Animalia</b> | Bony Fishes | Solenostomidae     | 5   |
| <b>Animalia</b> | Bony Fishes | Sparidae           | 70  |
| <b>Animalia</b> | Bony Fishes | Sphyraenidae       | 18  |
| <b>Animalia</b> | Bony Fishes | Stromateidae       | 9   |
| <b>Animalia</b> | Bony Fishes | Symphysanodontidae | 5   |
| <b>Animalia</b> | Bony Fishes | Synanceiidae       | 26  |
| <b>Animalia</b> | Bony Fishes | Syngnathidae       | 203 |
| <b>Animalia</b> | Bony Fishes | Synodontidae       | 46  |
| <b>Animalia</b> | Bony Fishes | Telmatherinidae    | 1   |
| <b>Animalia</b> | Bony Fishes | Terapontidae       | 14  |
| <b>Animalia</b> | Bony Fishes | Tetrabrachiidae    | 1   |

|                 |             |                 |    |
|-----------------|-------------|-----------------|----|
| <b>Animalia</b> | Bony Fishes | Tetragonuridae  | 3  |
| <b>Animalia</b> | Bony Fishes | Tetraodontidae  | 45 |
| <b>Animalia</b> | Bony Fishes | Tetrarogidae    | 15 |
| <b>Animalia</b> | Bony Fishes | Toxotidae       | 2  |
| <b>Animalia</b> | Bony Fishes | Trachichthyidae | 5  |
| <b>Animalia</b> | Bony Fishes | Triacanthidae   | 7  |
| <b>Animalia</b> | Bony Fishes | Trichiuridae    | 7  |
| <b>Animalia</b> | Bony Fishes | Trichonotidae   | 8  |
| <b>Animalia</b> | Bony Fishes | Triglidae       | 57 |
| <b>Animalia</b> | Bony Fishes | Tripterygiidae  | 96 |
| <b>Animalia</b> | Bony Fishes | Uranoscopidae   | 30 |
| <b>Animalia</b> | Bony Fishes | Urolophidae     | 33 |
| <b>Animalia</b> | Bony Fishes | Veliferidae     | 2  |
| <b>Animalia</b> | Bony Fishes | Xenisthmidae    | 13 |
| <b>Animalia</b> | Bony Fishes | Xiphiidae       | 1  |
| <b>Animalia</b> | Bony Fishes | Zanclidae       | 1  |
| <b>Animalia</b> | Bony Fishes | Zeidae          | 4  |
