# Supplementary material for: Habitat Availability and Heterogeneity and the Indo-Pacific Warm Pool as Predictors of Marine Species Richness in the Tropical Indo-Pacific
Source: PubMed Central journal article supplement (PMC3574161; doi:10.1371/journal.pone.0056245), 2013-02-15
Supplement: pone.0056245.s017.pdf [file pone.0056245.s017.pdf]

**Table S4 Single predictor Generalized Linear Model (GLM) and Spatial Linear Model (SLM) complete results at different grid sizes.**

| Models                                                 | Grid Size | n    | SW        | $R^2/p-R^2$  | CL        | $R^2/p-R^2$  | HDla     | $R^2/p-R^2$ | HDIn      | $R^2/p-R^2$ | SST      | $R^2/p-R^2$ | NPP      | $R^2/p-R^2$ |
|--------------------------------------------------------|-----------|------|-----------|--------------|-----------|--------------|----------|-------------|-----------|-------------|----------|-------------|----------|-------------|
| <b>Single predictor GLM (t-values) for all species</b> | Small     | 1390 | 13.930*** | 0.122        | 16.080*** | <b>0.157</b> | 4.254*** | 0.012       | 10.290*** | 0.070       | 0.790ns  | 0.000       | 3.599*** | 0.009       |
|                                                        | Medium    | 570  | 11.940*** | 0.199        | 16.390*** | <b>0.320</b> | 3.587*** | 0.020       | 9.704***  | 0.141       | 2.073*   | 0.006       | 2.284*   | 0.007       |
|                                                        | Large     | 223  | 8.959***  | 0.263        | 11.490*** | <b>0.371</b> | 2.926**  | 0.033       | 8.720***  | 0.253       | 5.173*** | 0.104       | 1.665ns  | 0.008       |
|                                                        | UTM       | 175  | 8.604***  | 0.296        | 11.220*** | <b>0.418</b> | 2.609**  | 0.032       | 7.931***  | 0.262       | 6.557*** | 0.194       | 0.416ns  | -0.005      |
|                                                        | X Large   | 95   | 6.861***  | 0.329        | 10.040*** | <b>0.515</b> | 2.648**  | 0.060       | 8.916***  | 0.455       | 6.425*** | 0.300       | 0.848ns  | -0.003      |
|                                                        | Largest   | 34   | 6.281***  | 0.538        | 5.296***  | <b>0.451</b> | 2.792**  | 0.171       | 6.356***  | 0.544       | 4.346*** | 0.352       | 0.480ns  | -0.024      |
| <b>Single predictor SLM (z-values) for all species</b> | Small     | 1390 | 11.562*** | <b>0.494</b> | 10.183*** | 0.484        | 3.566*** | 0.019       | 4.302***  | 0.453       | 0.161ns  | 0.446       | 1.985*   | 0.448       |
|                                                        | Medium    | 570  | 10.486*** | 0.444        | 12.407*** | <b>0.474</b> | 3.406*** | 0.351       | 5.506***  | 0.370       | 0.801ns  | 0.339       | 1.004ns  | 0.339       |
|                                                        | Large     | 223  | 7.507***  | 0.415        | 11.125*** | <b>0.530</b> | 4.854*** | 0.338       | 6.326***  | 0.376       | 3.934*** | 0.315       | 1.170ns  | 0.274       |
|                                                        | UTM       | 175  | 7.618***  | 0.495        | 10.615*** | <b>0.591</b> | 2.530*   | 0.352       | 5.459***  | 0.423       | 4.043*** | 0.382       | 0.145ns  | 0.329       |
|                                                        | X Large   | 95   | 5.221***  | 0.635        | 10.047*** | <b>0.773</b> | 1.579ns  | 0.544       | 3.974***  | 0.593       | 3.014**  | 0.569       | 0.825ns  | 0.535       |
|                                                        | Largest   | 34   | 4.480***  | 0.754        | 5.470***  | <b>0.793</b> | 0.655ns  | 0.616       | 3.241**   | 0.697       | 2.573*   | 0.675       | 1.605ns  | 0.639       |
| <b>Single predictor GLM (t-values) for all fishes</b>  | Small     | 1390 | 14.960*** | 0.138        | 17.410*** | <b>0.179</b> | 3.768*** | 0.009       | 10.410*** | 0.072       | 0.278ns  | -0.001      | 4.514*** | 0.014       |
|                                                        | Medium    | 570  | 13.570*** | 0.243        | 17.910*** | <b>0.360</b> | 3.006**  | 0.014       | 9.756***  | 0.142       | 1.804ns  | 0.004       | 3.209**  | 0.016       |
|                                                        | Large     | 223  | 10.610*** | 0.334        | 13.340*** | <b>0.444</b> | 1.767ns  | 0.009       | 8.638***  | 0.249       | 4.463*** | 0.079       | 2.820**  | 0.030       |
|                                                        | UTM       | 175  | 9.906***  | 0.358        | 13.780*** | <b>0.521</b> | 1.988*   | 0.017       | 8.142***  | 0.273       | 5.738*** | 0.155       | 1.188ns  | 0.002       |
|                                                        | X Large   | 95   | 6.861***  | 0.329        | 12.290*** | <b>0.615</b> | 1.491ns  | 0.013       | 8.583***  | 0.436       | 5.857*** | 0.262       | 1.908ns  | 0.027       |
|                                                        | Largest   | 34   | 7.440***  | 0.622        | 6.401***  | <b>0.548</b> | 2.671*   | 0.157       | 6.361***  | 0.545       | 3.840*** | 0.294       | 0.890ns  | -0.006      |
| <b>Single predictor SLM (z-values) for all fishes</b>  | Small     | 1390 | 12.522*** | <b>0.518</b> | 10.425*** | 0.502        | 3.391*** | 0.468       | 4.270***  | 0.470       | 0.185ns  | 0.463       | 2.105*   | 0.465       |
|                                                        | Medium    | 570  | 11.515*** | 0.471        | 13.018*** | <b>0.492</b> | 3.278**  | 0.362       | 5.645***  | 0.383       | 1.087ns  | 0.351       | 1.226ns  | 0.352       |
|                                                        | Large     | 223  | 8.469***  | 0.474        | 11.833*** | <b>0.575</b> | 4.416*** | 0.364       | 6.357***  | 0.412       | 3.741*** | 0.350       | 1.683ns  | 0.318       |
|                                                        | UTM       | 175  | 8.724***  | 0.520        | 12.499*** | <b>0.635</b> | 2.335*   | 0.334       | 5.837***  | 0.422       | 3.653*** | 0.359       | 0.399ns  | 0.314       |
|                                                        | X Large   | 95   | 6.778***  | 0.714        | 10.624*** | <b>0.807</b> | 0.763ns  | 0.581       | 3.936***  | 0.634       | 2.808**  | 0.609       | 1.331ns  | 0.586       |
|                                                        | Largest   | 34   | 5.593***  | 0.750        | 6.372***  | <b>0.786</b> | 0.776ns  | 0.539       | 3.575***  | 0.645       | 2.0214*  | 0.581       | 1.748ns  | 0.570       |

|                                                                    |         |      |           |              |           |              |          |       |           |              |          |              |          |        |
|--------------------------------------------------------------------|---------|------|-----------|--------------|-----------|--------------|----------|-------|-----------|--------------|----------|--------------|----------|--------|
| <b>Single predictor GLM (t-values) for invertebrates</b>           | Small   | 1390 | 10.320*** | 0.071        | 12.810*** | <b>0.105</b> | 4.884*** | 0.016 | 8.866***  | 0.053        | 0.976ns  | 0.000        | 1.420ns  | 0.001  |
|                                                                    | Medium  | 570  | 7.550***  | 0.090        | 12.780*** | <b>0.222</b> | 4.019*** | 0.026 | 8.142***  | 0.103        | 1.335ns  | 0.001        | 0.323ns  | -0.002 |
|                                                                    | Large   | 223  | 5.102***  | 0.101        | 7.990***  | <b>0.221</b> | 4.898*** | 0.094 | 7.789***  | 0.212        | 4.291*** | 0.073        | -0.455ns | -0.004 |
|                                                                    | UTM     | 175  | 4.383***  | 0.095        | 6.382***  | 0.186        | 4.076*** | 0.082 | 6.504***  | <b>0.192</b> | 6.571*** | 0.195        | -1.554ns | 0.008  |
|                                                                    | X Large | 95   | 4.408***  | 0.164        | 5.626***  | 0.246        | 4.684*** | 0.182 | 8.490***  | <b>0.431</b> | 6.089*** | 0.277        | -1.199ns | 0.005  |
|                                                                    | Largest | 34   | 2.809***  | 0.173        | 2.038*    | 0.087        | 2.497*   | 0.137 | 5.509***  | <b>0.471</b> | 4.459*** | 0.364        | -1.295ns | 0.020  |
| <b>Single predictor SLM (z-values) for invertebrates</b>           | Small   | 1390 | 9.794***  | <b>0.437</b> | 9.147***  | 0.432        | 3.531*** | 0.403 | 3.777***  | 0.404        | 0.022ns  | 0.398        | 1.484ns  | 0.399  |
|                                                                    | Medium  | 570  | 7.442***  | 0.299        | 10.755*** | <b>0.358</b> | 3.506*** | 0.248 | 4.790***  | 0.260        | 0.099ns  | 0.231        | 0.290ns  | 0.232  |
|                                                                    | Large   | 223  | 4.978***  | 0.256        | 9.150***  | <b>0.397</b> | 5.482*** | 0.272 | 5.933***  | 0.278        | 3.020**  | 0.205        | 0.242ns  | 0.174  |
|                                                                    | UTM     | 175  | 3.961***  | 0.341        | 6.815***  | <b>0.433</b> | 2.718**  | 0.311 | 3.987***  | 0.339        | 3.935*** | 0.334        | -0.443ns | 0.283  |
|                                                                    | X Large | 95   | 2.568*    | 0.644        | 7.468**   | <b>0.760</b> | 2.419*   | 0.642 | 3.397***  | 0.659        | 2.231*   | 0.638        | 0.239ns  | 0.620  |
|                                                                    | Largest | 34   | 0.794ns   | 0.794        | 1.306ns   | 0.801        | -0.006ns | 0.791 | 3.039**   | 0.835        | 3.798*** | <b>0.853</b> | -0.008ns | 0.791  |
| <b>Single predictor GLM (t-values) for habitat-forming species</b> | Small   | 1390 | 11.570*** | 0.087        | 13.400*** | <b>0.114</b> | 5.984*** | 0.024 | 11.870*** | 0.092        | 2.608**  | 0.004        | 0.397ns  | -0.001 |
|                                                                    | Medium  | 570  | 9.745***  | 0.142        | 13.450*** | <b>0.240</b> | 4.427*** | 0.032 | 10.258*** | 0.155        | 2.955**  | 0.013        | 0.296ns  | -0.002 |
|                                                                    | Large   | 223  | 6.213***  | 0.145        | 7.947***  | 0.219        | 4.580*** | 0.083 | 8.897***  | <b>0.260</b> | 6.492*** | 0.156        | -0.621ns | -0.003 |
|                                                                    | UTM     | 175  | 6.763***  | 0.205        | 7.365***  | 0.234        | 3.455*** | 0.059 | 8.388***  | <b>0.285</b> | 8.246*** | 0.278        | -1.137ns | 0.002  |
|                                                                    | X Large | 95   | 4.408***  | 0.164        | 5.897***  | 0.264        | 3.587*** | 0.112 | 8.467***  | <b>0.429</b> | 7.568*** | 0.375        | -0.666ns | -0.006 |
|                                                                    | Largest | 34   | 3.002**   | 0.195        | 2.493*    | 0.136        | 2.647*   | 0.154 | 5.505***  | <b>0.470</b> | 2.266*** | 0.540        | -0.266ns | -0.029 |
| <b>Single predictor SLM (z-values) for habitat-forming species</b> | Small   | 1390 | 10.079*** | <b>0.550</b> | 9.502***  | 0.540        | 3.631*** | 0.515 | 4.678***  | 0.518        | 0.252ns  | 0.510        | 1.929ns  | 0.511  |
|                                                                    | Medium  | 570  | 9.480***  | 0.408        | 11.359*** | <b>0.440</b> | 3.213**  | 0.327 | 5.686***  | 0.350        | 0.645ns  | 0.315        | 0.383ns  | 0.315  |
|                                                                    | Large   | 223  | 5.842***  | 0.350        | 9.214***  | <b>0.455</b> | 5.403*** | 0.337 | 6.041***  | 0.347        | 4.210*** | 0.299        | 0.026ns  | 0.250  |
|                                                                    | UTM     | 175  | 6.597***  | 0.513        | 8.033***  | <b>0.556</b> | 2.985**  | 0.422 | 5.824***  | 0.489        | 4.441*** | 0.445        | -0.279ns | 0.393  |
|                                                                    | X Large | 95   | 2.971**   | 0.665        | 5.061***  | <b>0.712</b> | 1.208ns  | 0.640 | 2.839**   | 0.662        | 4.160*** | 0.688        | -1.158ns | 0.639  |
|                                                                    | Largest | 34   | 0.109ns   | 0.423        | 0.802ns   | 0.433        | 0.683ns  | 0.430 | 3.264*    | <b>0.529</b> | 5.174*** | 0.677        | 0.111ns  | 0.424  |

The predictors are shallow water area (SW), coastline length (CL), habitat diversity based on area (HD<sub>a</sub>), habitat diversity based on number of patches (HD<sub>n</sub>), sea surface temperature (SST), and net primary productivity (NPP). Values under predictor variables are t-values for GLM and z-values for SLM. Asterisks indicate significance value of P: \* (<0.05), \*\* (<0.01); \*\*\* (<0.001); ns (not significant). Sample size for each grid (n) is shown. The highest adjusted  $R^2$  (GLM) and pseudo- $R^2$  (p- $R^2$ ; SLM) value within each grid size are highlighted in boldface.
